# Supplementary material for: Pyrene pyridine-conjugate as Ag selective fluorescent chemosensor
Source: Royal Society of Chemistry journal article supplement (doi:10.1039/c4ra04001e), 2014-01-01
Supplement: c4ra04001e1.pdf [file c4ra04001e1.pdf]

## Pyrene pyridine- conjugate as Ag selective Fluorescent chemosensor

K. Velmurugan<sup>a</sup>, A. Raman<sup>b</sup>, S. Easwaramoorthi<sup>b,\*</sup>, R. Nandhakumar<sup>a,\*</sup>

<sup>a</sup>Department of Chemistry,  
Karunya University, Coimbatore-641 114, India.

\*E-mail: [nandhakumar@karunya.edu](mailto:nandhakumar@karunya.edu)

<sup>b</sup>Chemical Laboratory, CSIR-Central Leather Research Institute,  
Adyar, India

\*E-mail: [moorthi@clri.res.in](mailto:moorthi@clri.res.in)

### Contents

---

|    |         |                                            |    |
|----|---------|--------------------------------------------|----|
| 1. | Fig. S1 | <sup>1</sup> H NMR Spectrum of <b>2</b>    | S2 |
| 2. | Fig. S2 | <sup>13</sup> C NMR Spectrum of <b>2</b>   | S2 |
| 3. | Fig. S3 | <sup>1</sup> H NMR Spectrum of PPC         | S3 |
| 4. | Fig. S4 | <sup>13</sup> C NMR Spectrum of <b>PPC</b> | S3 |
| 5. | Fig. S5 | Mass Spectrum of <b>PPC</b>                | S4 |

6. Fig. S6 Mass Spectrum of **PPC** +  $\text{Ag}^+$  S4
7. Fig. S7 UV-visible absorption spectrum of **PPC** S5
8. Fig. S8 The detection limits calculation of **PPC** with  $\text{Ag}^+$  S5
9. Fig. S9 Geometry of the **PPC** optimized using Gaussian 03 at B3LYP /6-31G level of theory S6
10. Fig. S10 Highest occupied molecular orbital (top) and Lowest Unoccupied Molecular Orbital (bottom) of **PPC** calculated using Gaussian 03 software at B3LYP /6-31G level of theory S7
11. Fig. S11 Geometry of the **PPC**+ $\text{Ag}^+$  optimized using Gaussian 03 at B3LYP /GenECP level of theory S8
12. Fig. S12 Highest Occupied Molecular Orbital (top) Lowest Unoccupied Molecular Orbital (bottom) of **PPC**+ $\text{Ag}^+$  calculated using Gaussian 03 at B3LYP /GenECP level of theory S9
13. Fig. S13 Selectivity Coefficient of **PPC** with  $\text{Ag}^+$  ion S10

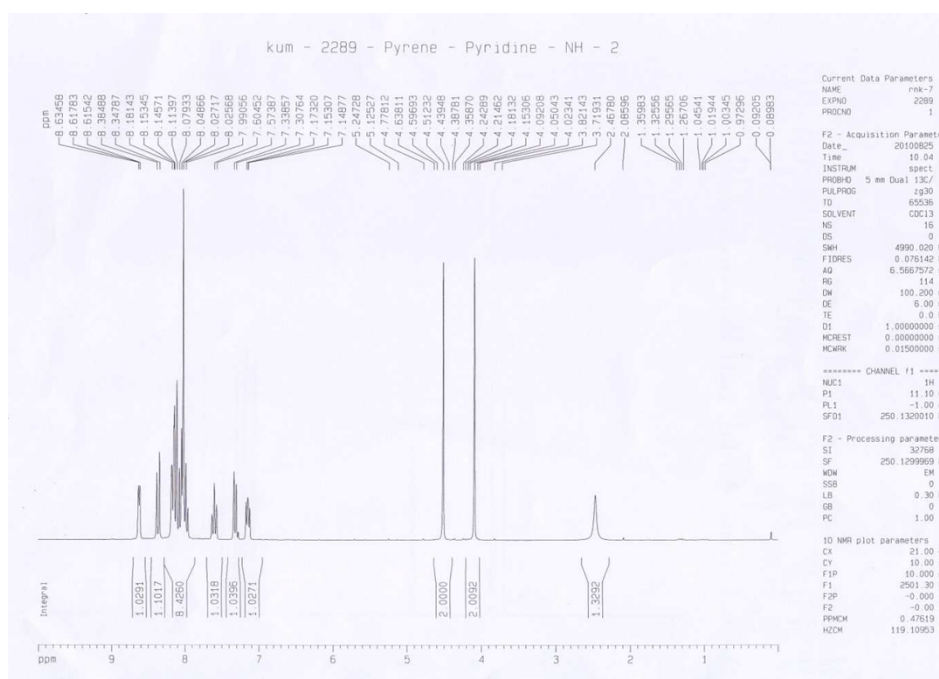

**Fig. S1.**  $^1\text{H}$  NMR spectra of compound **2**

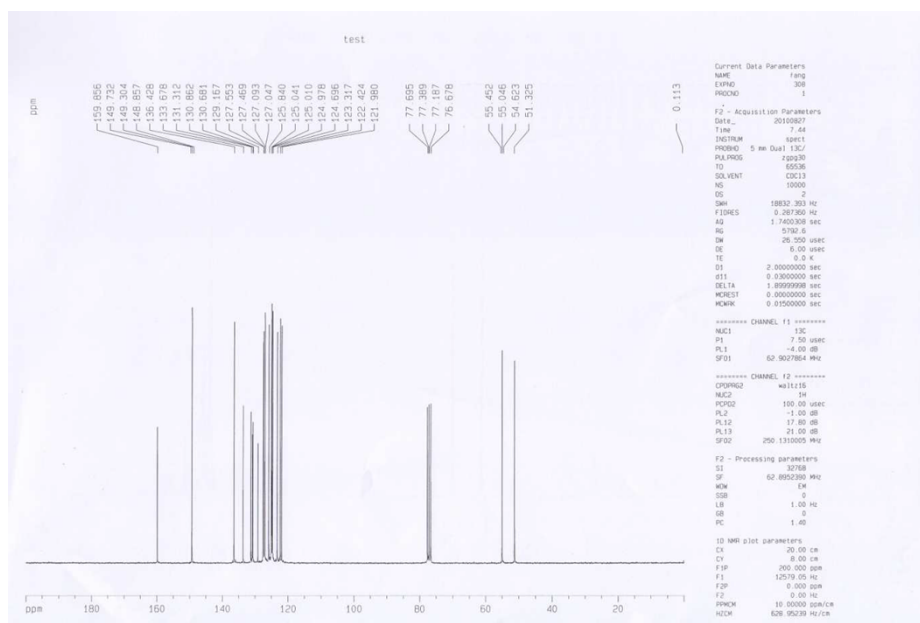Fig. S2.  $^{13}\text{C}$  NMR spectra of compound 2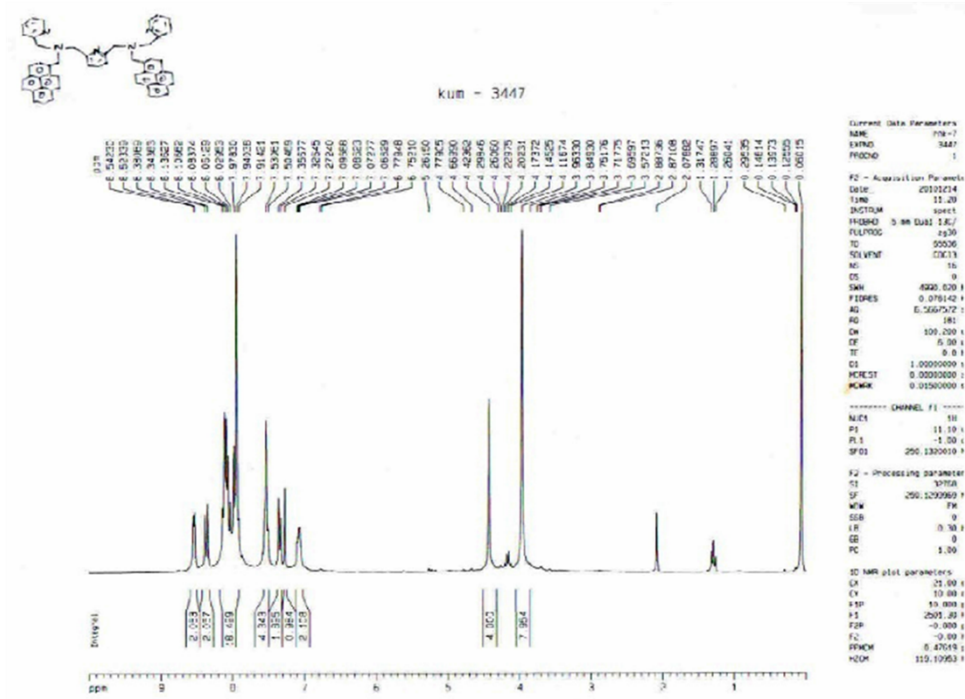Fig. S3.  $^1\text{H}$  NMR Spectrum of PPC

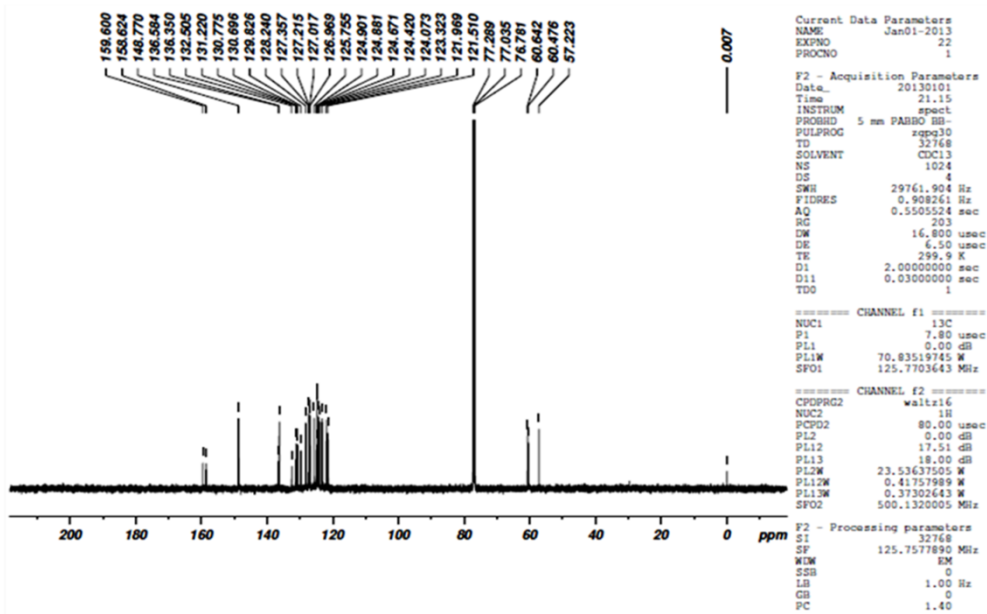

Fig. S4.  $^{13}\text{C}$  NMR Spectrum of PPC

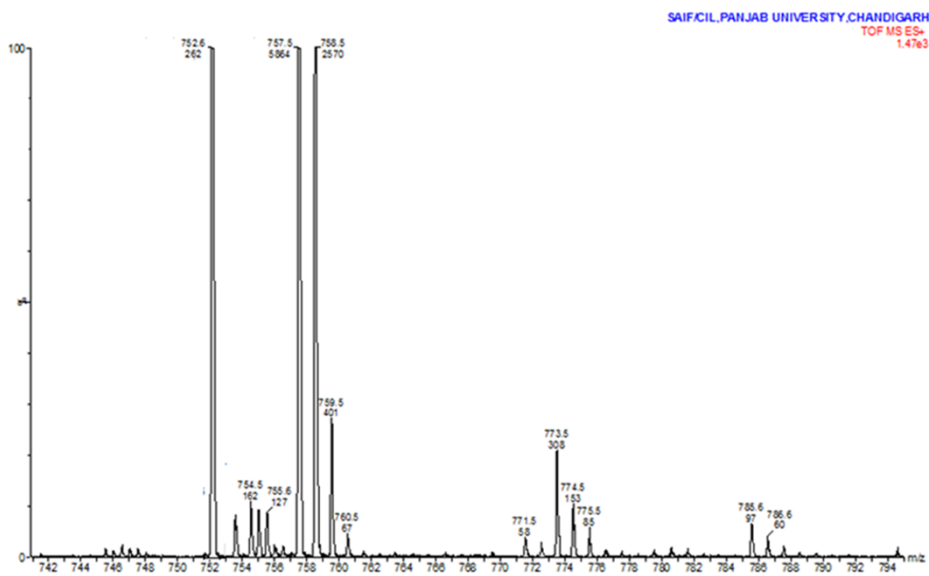

Fig. S5. Mass Spectrum of PPC

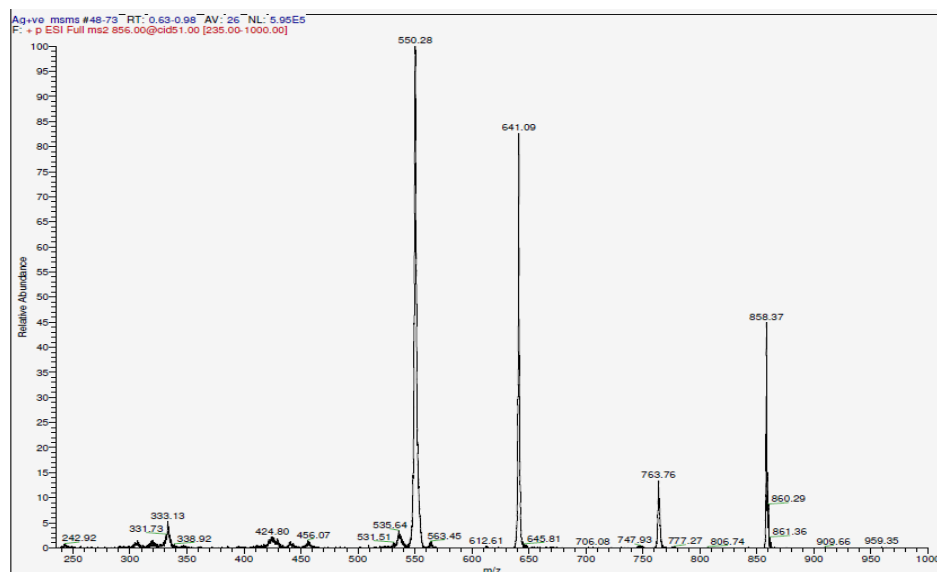

Fig. S6. Mass Spectrum of PPC + Ag<sup>+</sup>

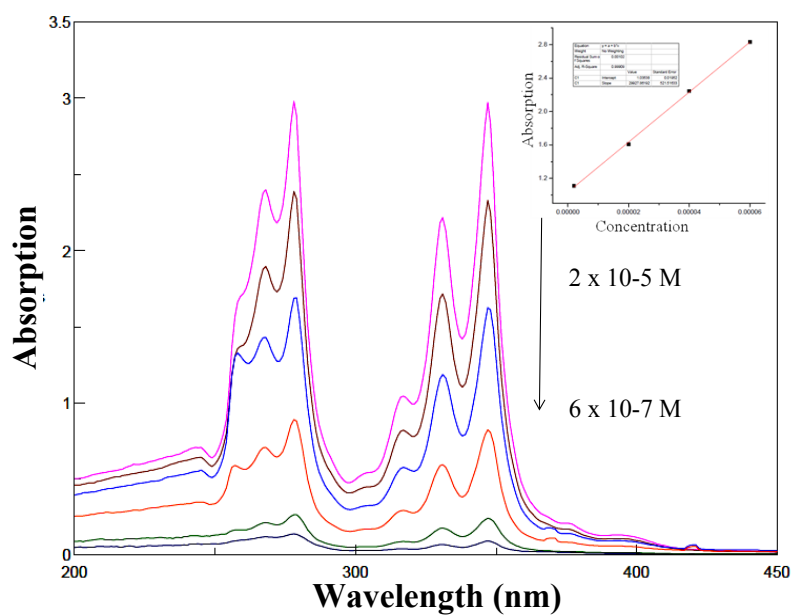

Fig. S7. UV-visible absorption spectrum of PPC in different concentrations (DMSO /H<sub>2</sub>O, 1;1 v/v, HEPES = 50 mM, pH=7.4)

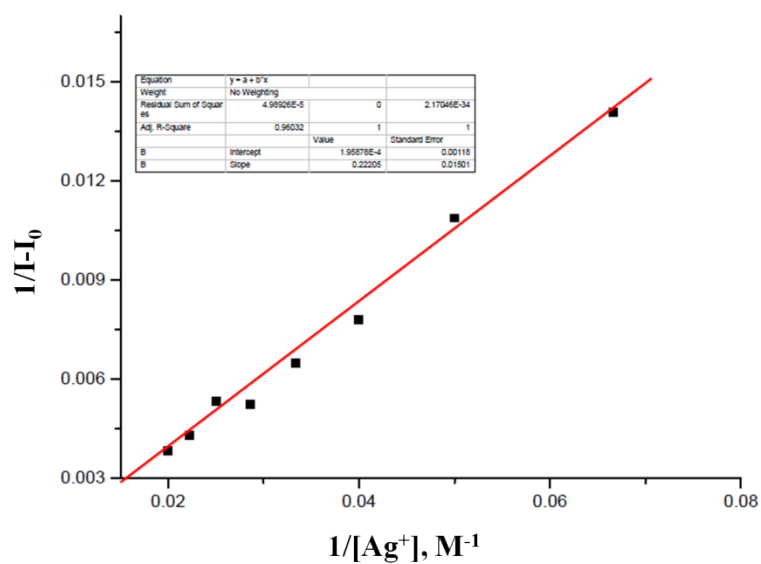

**Fig. S8.** The detection limit of PPC with  $\text{Ag}^+$

$$\text{LOD} = 0.29 \times 10^{-8} \text{ M}^{-1}$$

$$\text{LOQ} = 0.88 \times 10^{-8} \text{ M}^{-1}$$

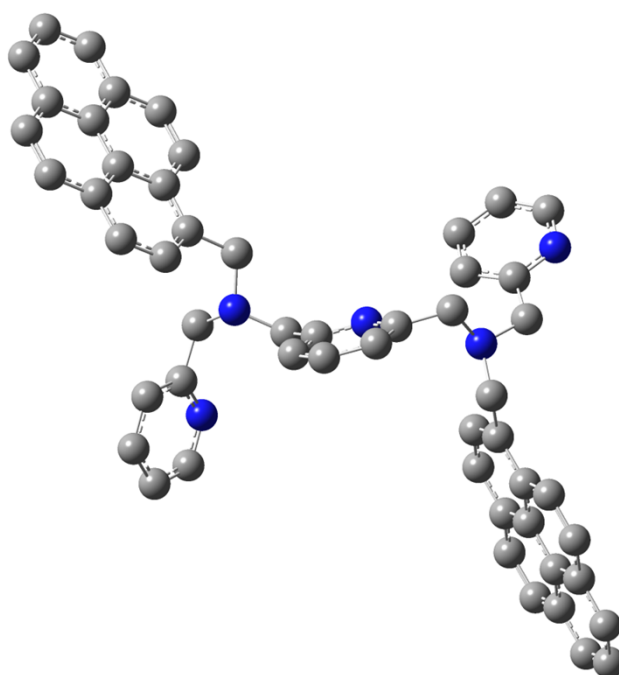

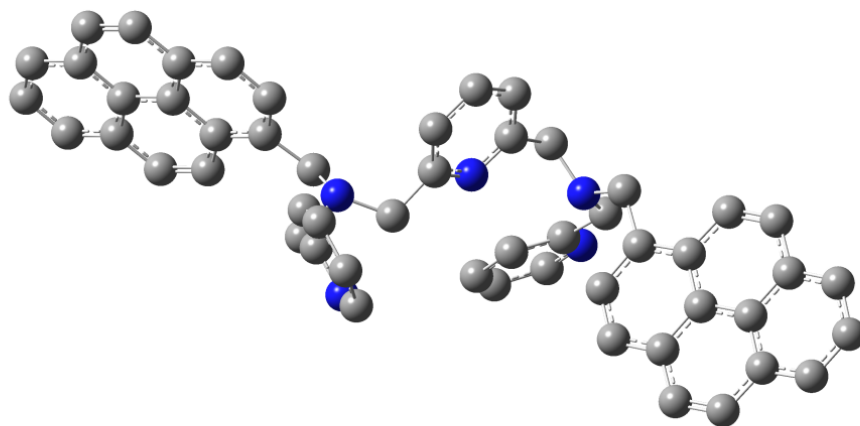

**Fig. S9.** Geometry of the **PPC** optimized using Gaussian 03 at B3LYP /6-31G level of theory

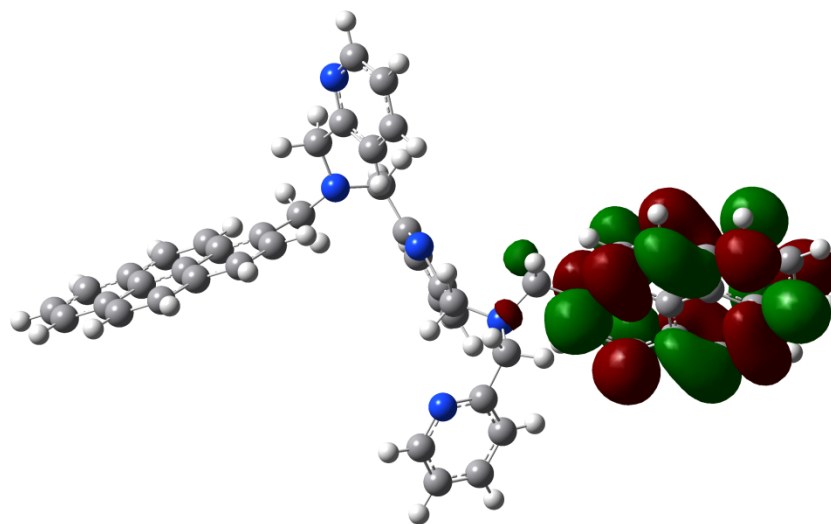

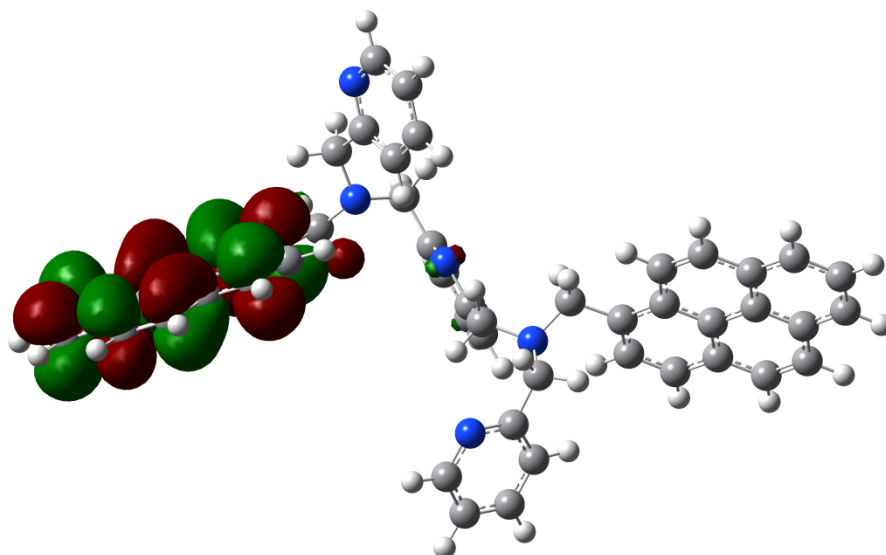

**Fig. S10.** Highest occupied molecular orbital (top) and Lowest Unoccupied Molecular Orbital (bottom) of PPC calculated using Gaussian 03 software at B3LYP /6-31G level of theory

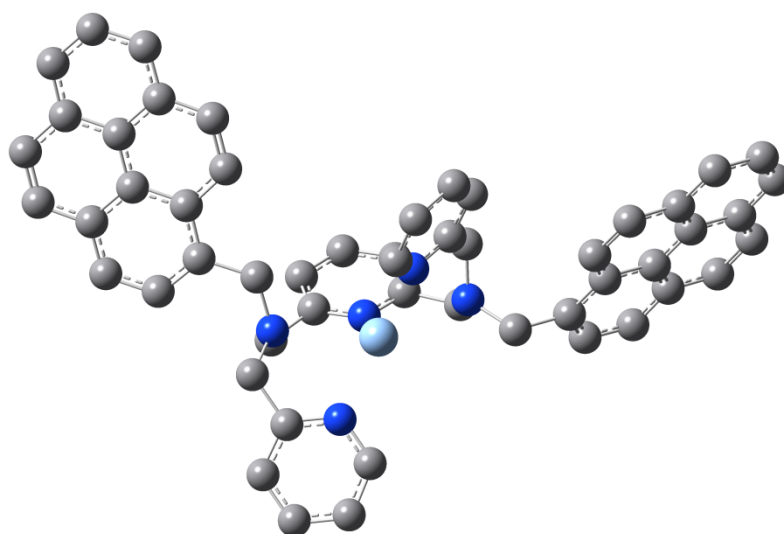



**Fig. S11.** Geometry of the **PPC+Ag<sup>+</sup>** optimized using Gaussian 03 at B3LYP /GenECP level of theory

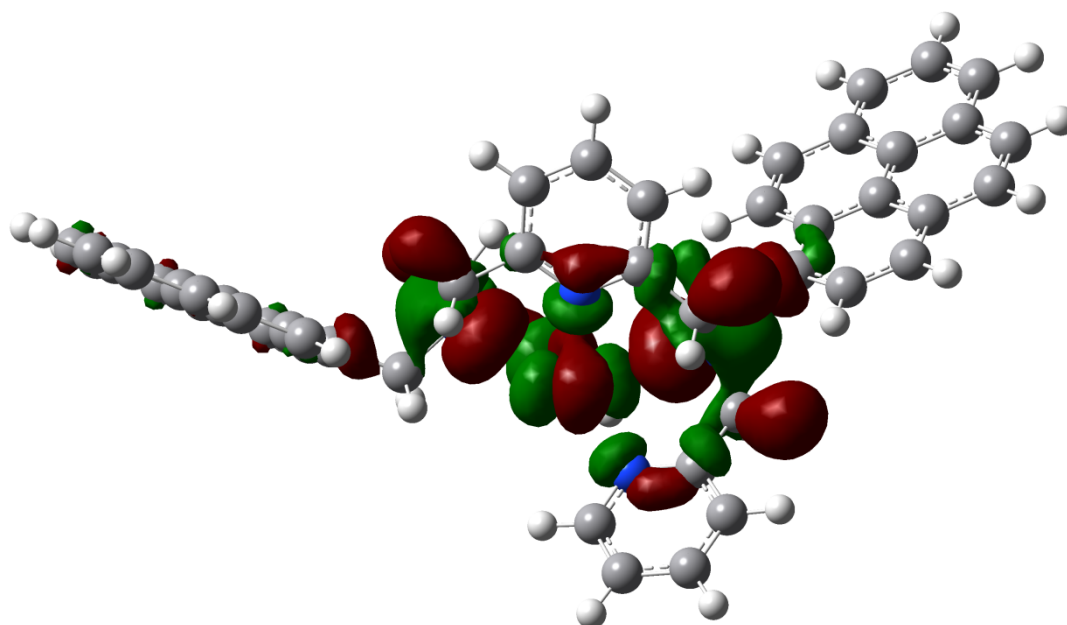

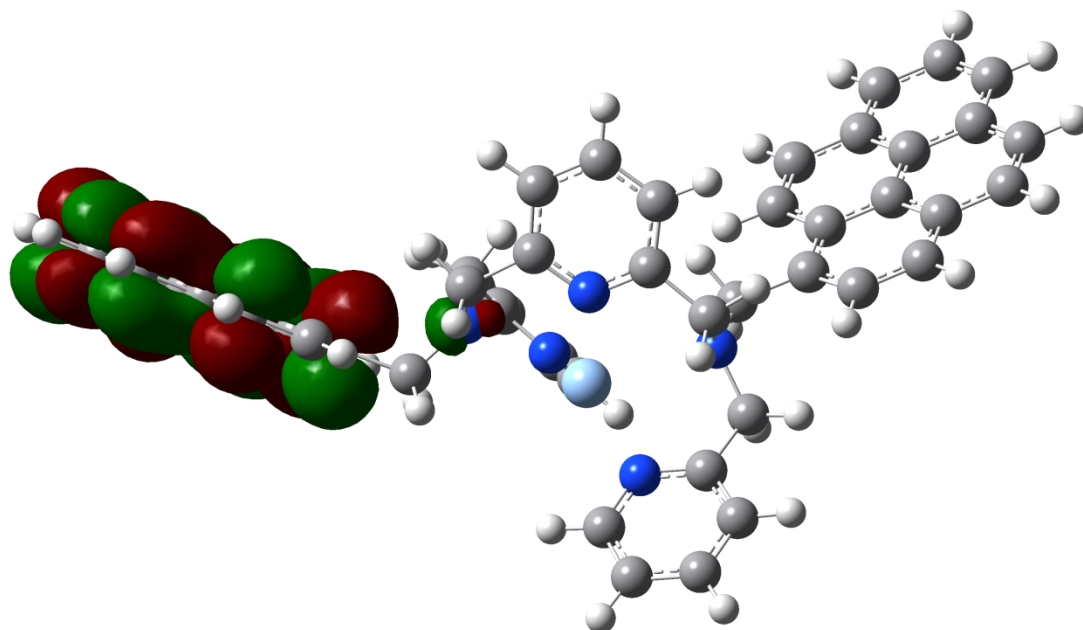

**Fig. S12.** Highest Occupied Molecular Orbital (top) Lowest Unoccupied Molecular Orbital (bottom) of **PPC+Ag<sup>+</sup>** calculated using Gaussian 03 at B3LYP /GenECP level of theory

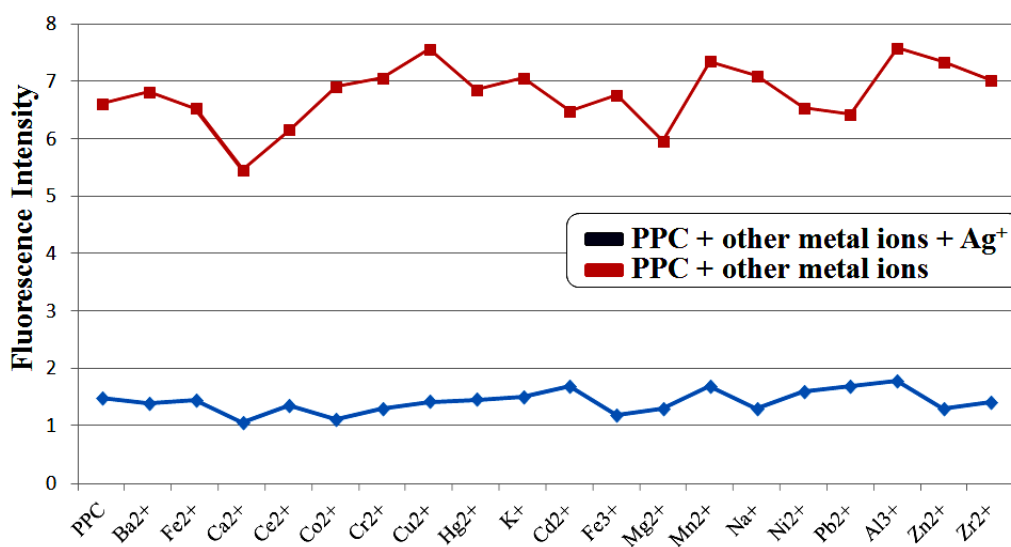

**Fig. S13.** Selectivity coefficient of **PPC** with **Ag<sup>+</sup>** ion
